# Supplementary material for: “Shaping” of cell signaling via AKAP-tethered PDE4D: Probing with AKAR2-AKAP5 biosensor
Source: PubMed Central journal article supplement (PMC3493269; doi:10.1186/1750-2187-7-4), 2012-05-14

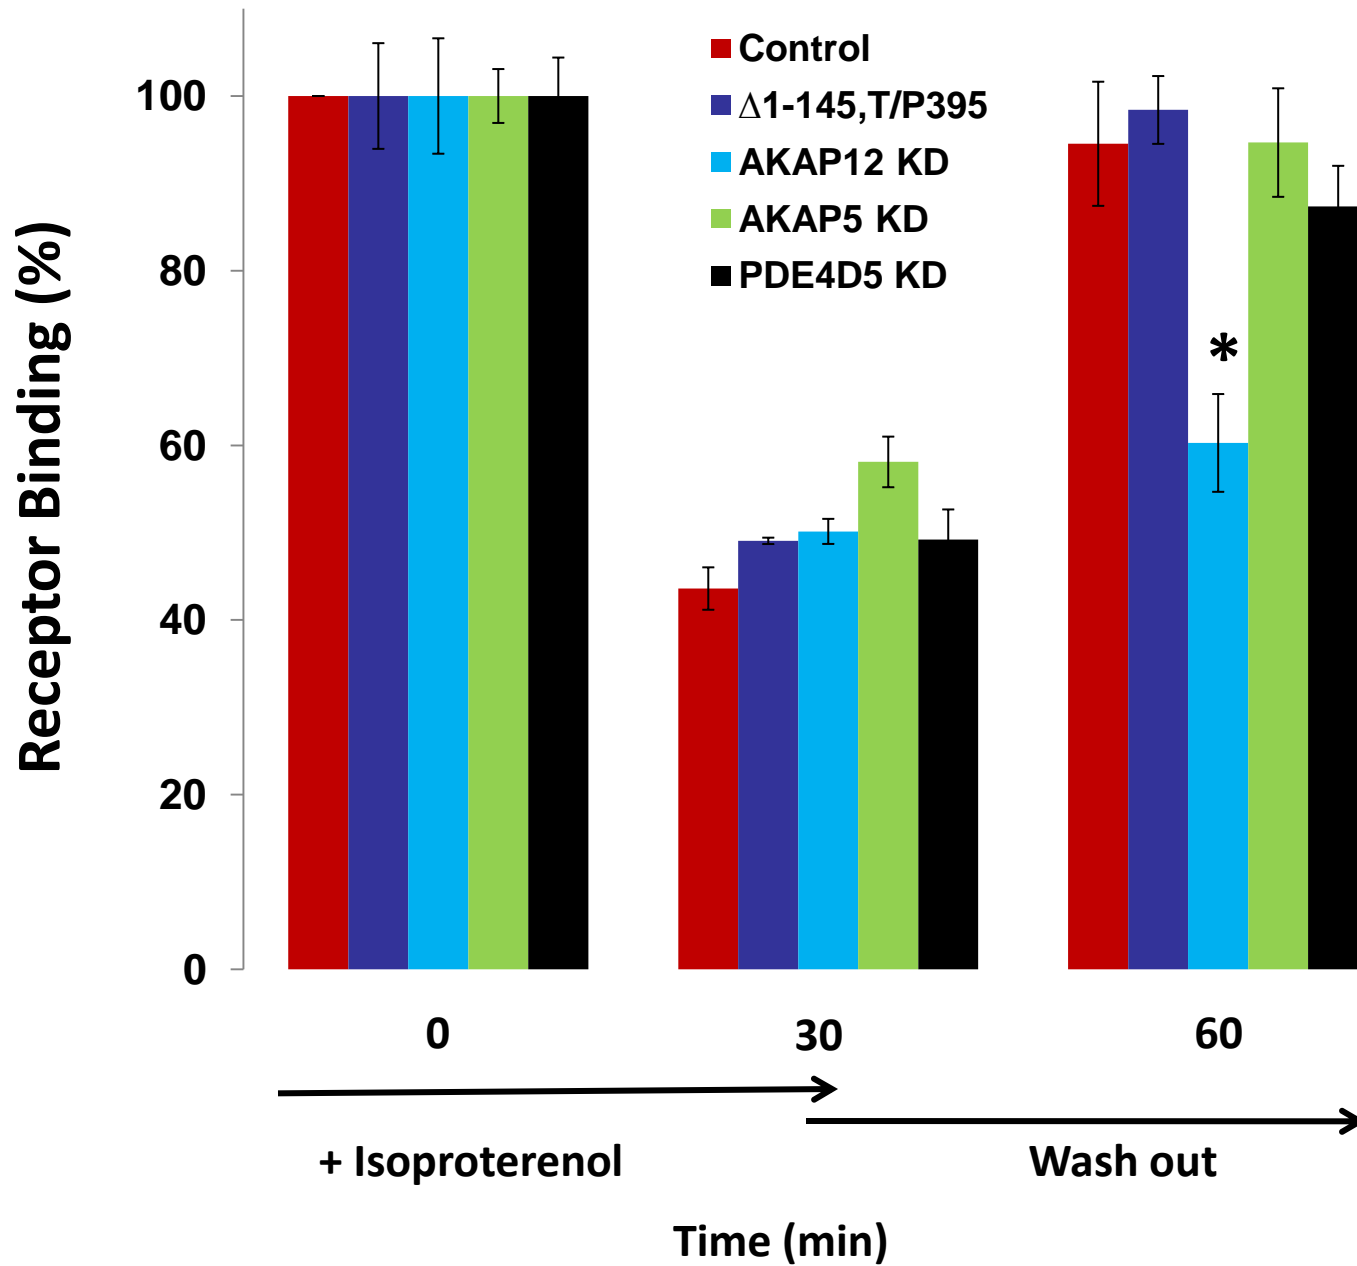

Supplement: 1750-2187-7-4-S2.pdf [file 1750-2187-7-4-S2.pdf]
